# Supplementary material for: Automated Computer Vision and Dose-Response Modeling Improve Throughput and Accuracy of an Ex Vivo Functional Precision Medicine Platform
Source: Research Square preprint supplement (doi:10.21203/rs.3.rs-7303402/v1), 2025-09-08

**Supplemental Figure 1. Detailed timelines for each of the three Microtumor and OBSC assays** (**A**) The assay for measuring the survival of established tumor lines involves measuring an Mcherry signal on Day 1.  (**B**) Patient Tumor are transfected just before being seeded, so the signal cannot be measured on Day 1.  Each microtumor is seeded with an equal volume of tumor tissue. (**C**) The OBSC toxicity assay relies on a Propidium Iodide (P.I.) signal of cell death, and thus the creation of a positive control group is necessary.


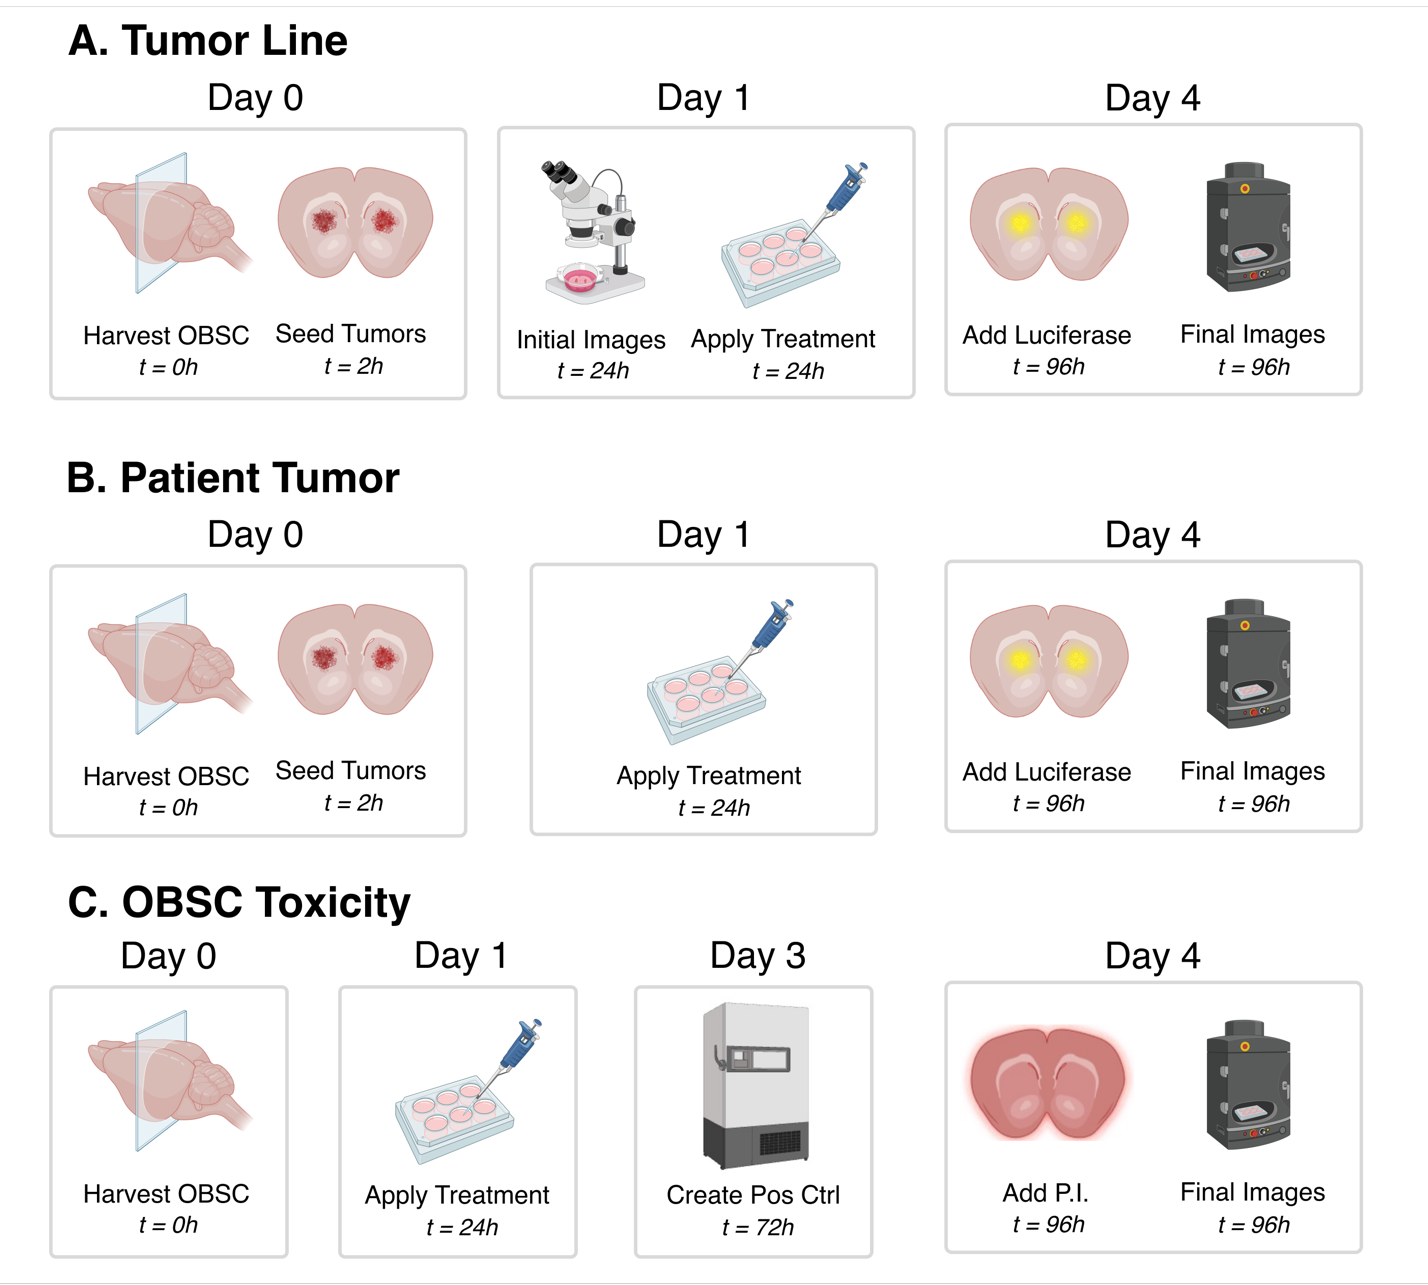


**Supplemental Figure 2. ShinyApp used to expedite the recording of experimental metadata**  (**A**) The left-hand side of the screen features a scrollable form which allows users to specify treatment, tumor, doses, etc. for a given experiment.  Many fields allow users to select from drop-down lists to increase efficiency and consistency. (**B**) The Metadata Render panel allows users to preview the csv output and download it.  (**C**) The Metadata Explainer provides instructions on how to input metadata correctly.


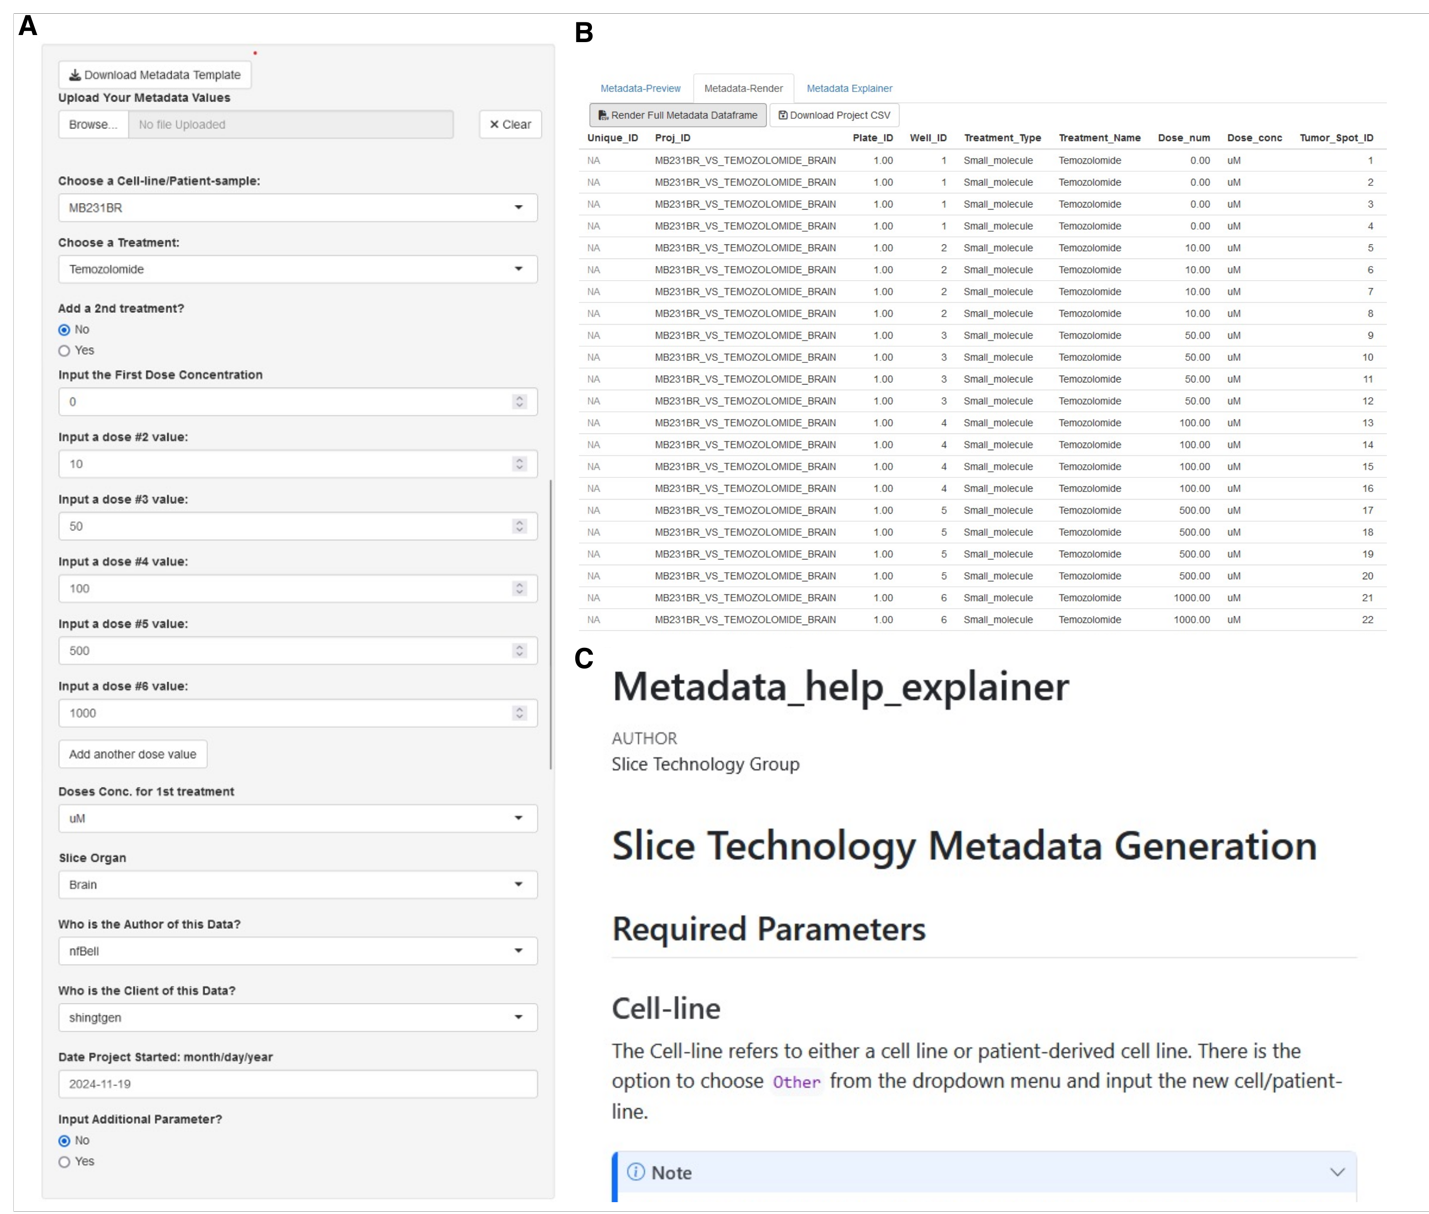


**Supplemental Figure 3.** Investigating automation’s impact in cases where microtumor survival measurements differed. (**A**) A Bland-Altman graph comparing Manual and Automated Image Analysis, highlighting the four microtumor experiments that accounted for all differences greater than 50% (**B**) A Dose-Response plot for PT21450 vs. Temozolomide 04/25/2022.  Automated results either maintained or increased consistency within dose groups.  A general shift downward across the non-control groups indicates that an improved measurement of negative control micro-tumors improved all other results. (**C**) The Dose-Response plot for MS21 vs. Trametinib 02/17/2022 also shows improved consistency at every dose group.  Some microtumors that had been manually measured as very high were found to be comparable to other replicates after Automation. (**D**) The Dose-Response Plot for MS21 vs. Gemcitabine 03/31/2022.  Although automation reduces consistency at 1 μM, this measurement is because that micro-tumor had an extremely dim Day 1 signal, resulting in a high normalized measurement.  Thus, automation produced an accurate measurement of this microtumor’s growth rate, and the result would be filtered out in subsequent outlier removal. (**E**) The Bland-Altman for OBSC toxicity experiments, with the other experiment that featured disagreements, OBSC vs. Temozolomide 04/04/2022, highlighted in pink. (**F**) This experiment also displays a pattern of survival measurements being increased across all doses, indicating that an improvement in control measurements improved overall experimental results.


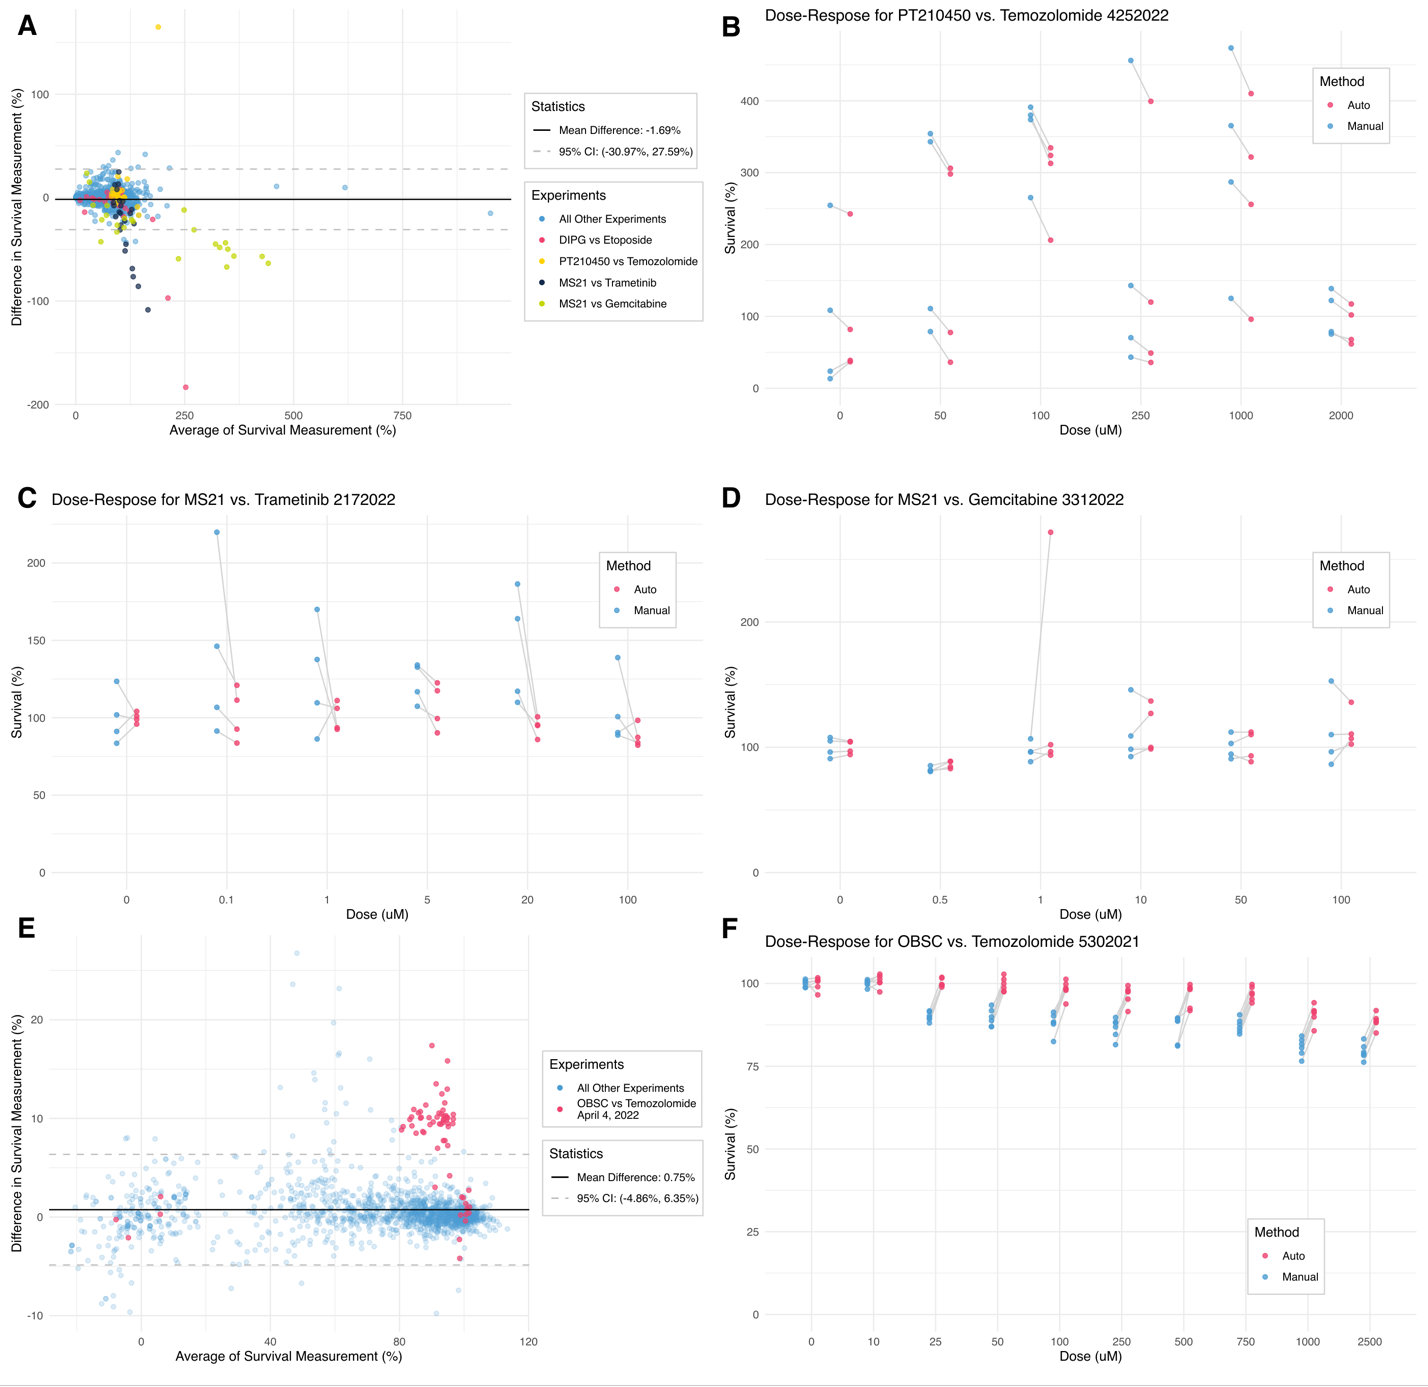


**Supplemental Figure 4. Comparisons of manual and automated survival measurements across all experiments.**


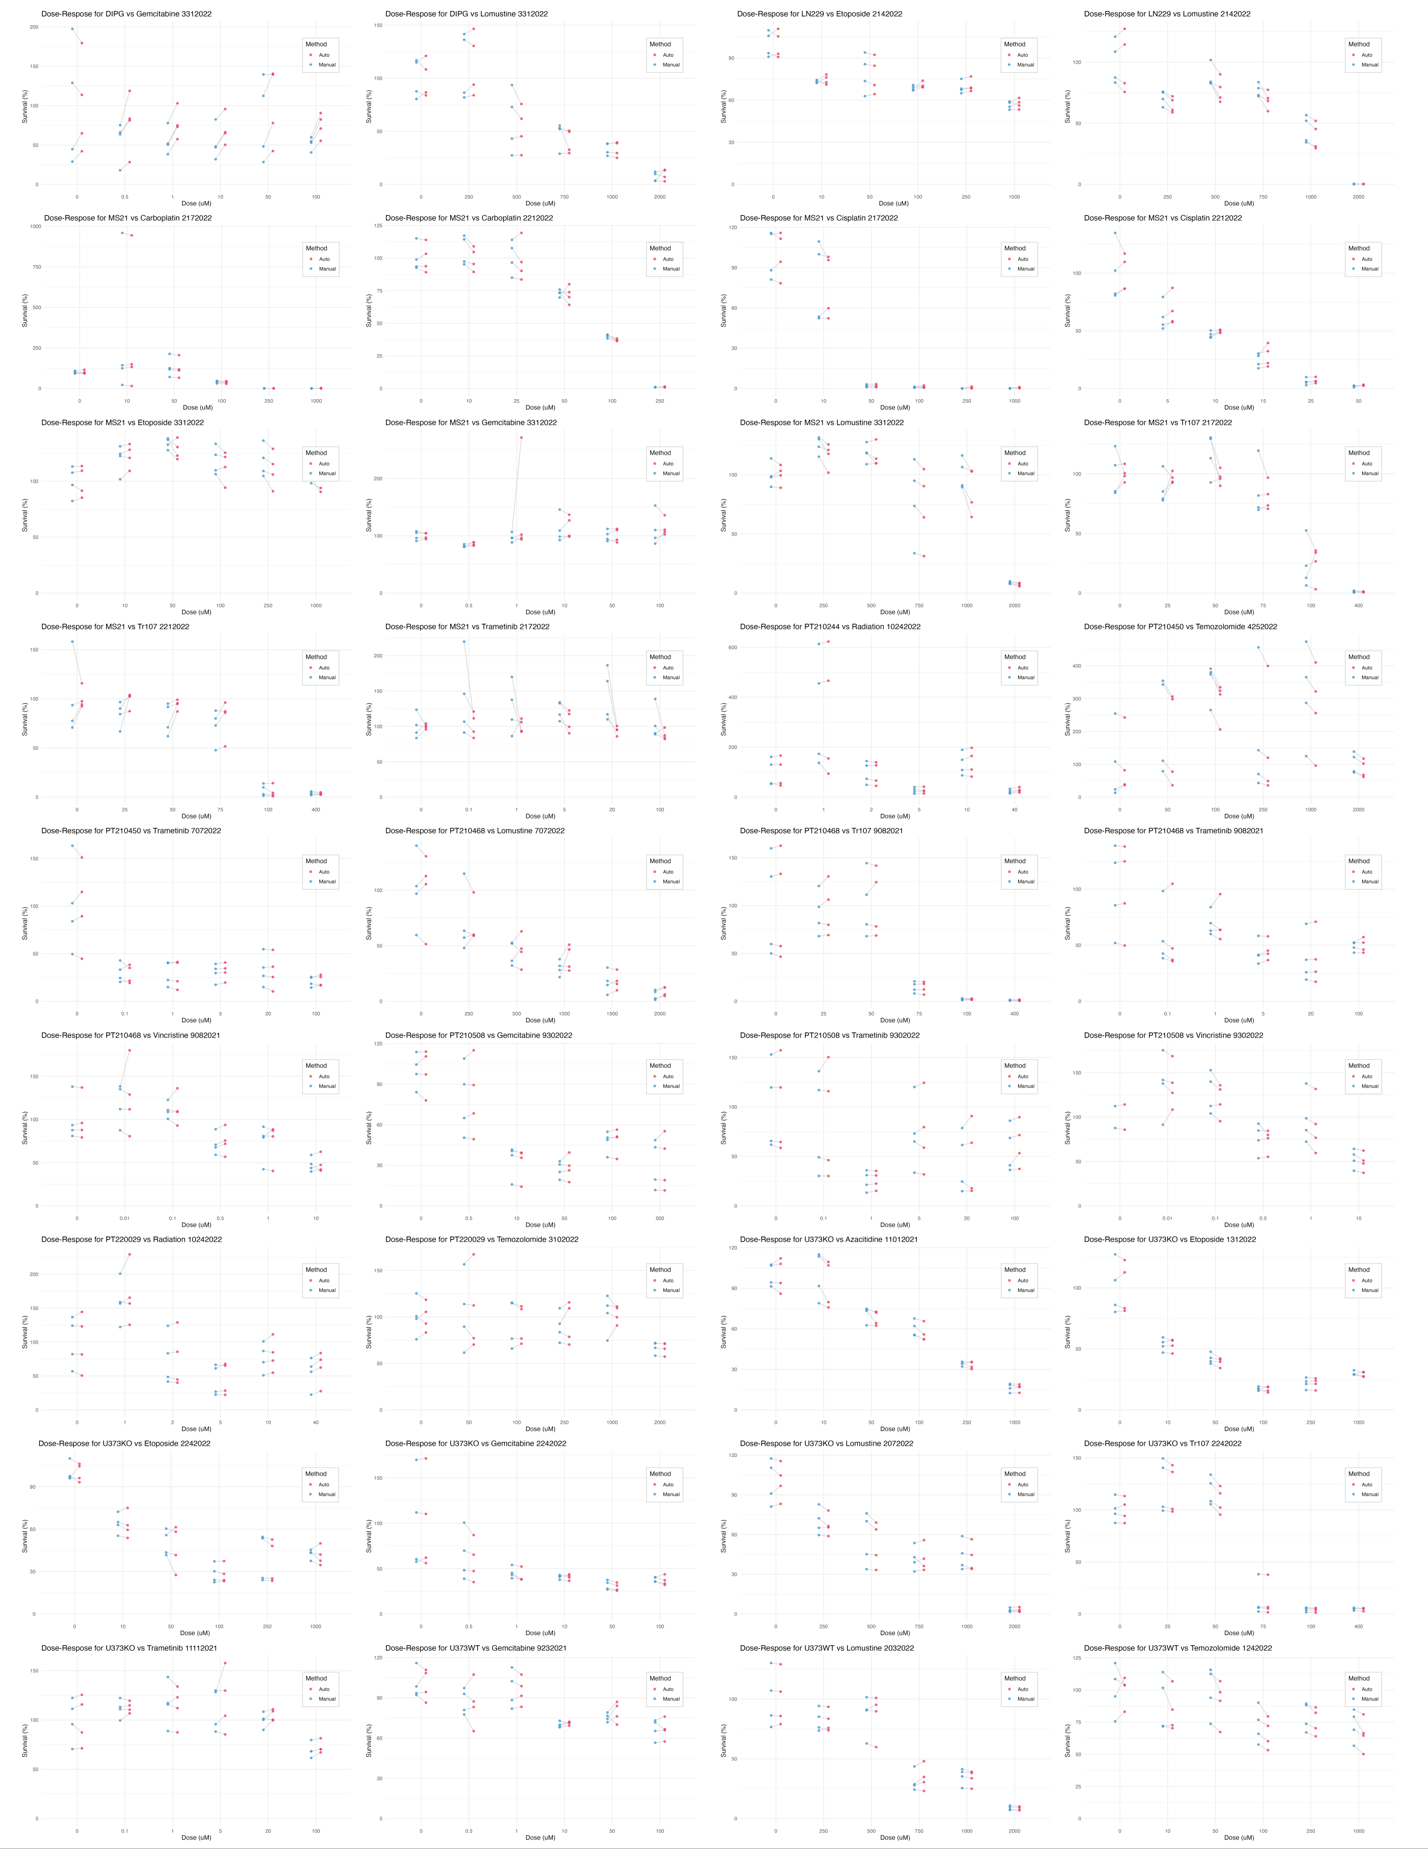


**Supplemental Figure 5.  Decreasing Model Examples.** An example of each **decreasing** model type in our pipeline being selected as the best fit model for a given experiment.  The selected model is shown in pink, with the other models included for comparison.(**A**) The exponential decay model fitted to U373KO vs Lomustine 02072022. (**B**) The Log-Logistic model fitted to MS21 vs Cisplatin 02172022. (**C**) The first parameterization of the Weibull model fitted to MS21 vs Cisplatin 02212022. (**D**) The second parameterization of the Weibull model fitted to PT210468 vs TR107 09082021.


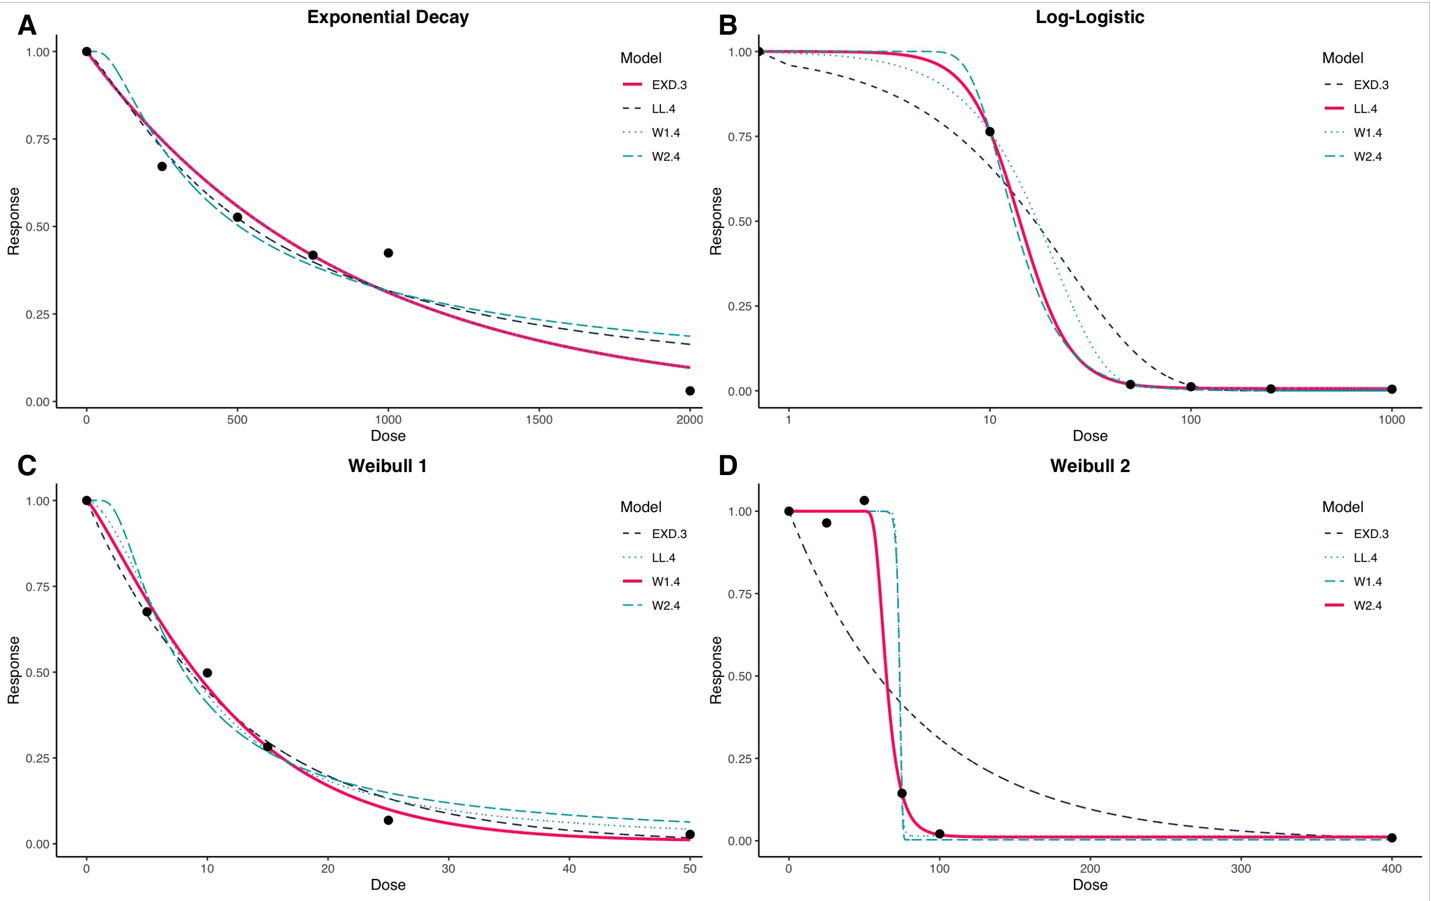


**Supplemental Figure 6.  Growth Model Experiments.** An example of each **growth** model type in our pipeline being selected as the best fit model for a given experiment.  The selected model is shown in pink, with the other models included for comparison.(**A**) The standard Brain-Cousens model fitted to U373KO vs TR107 02242022.   (**B**) The Reparametrized Brain-Cousens model fitted to PT210508 vs Vincristine 09302022. Note that the standard parameterization was not fit successfully to this data.  (**C**) The Cedergreen-Ritz-Streibig 4a model fitted to MS21 vs Lomustine 03312022.  (**D**) The Cedergreen-Ritz-Streibig 4a model fitted to LN229 vs Lomustine 02142022, a Plateau experiment. (**E**) The Cedergreen-Ritz-Streibig 4c model fitted to PT210450 vs Temozolomide 04252022. (**F**) The Cedergreen-Ritz-Streibig 5b model fitted to MS21 vs Etoposide 03312022.


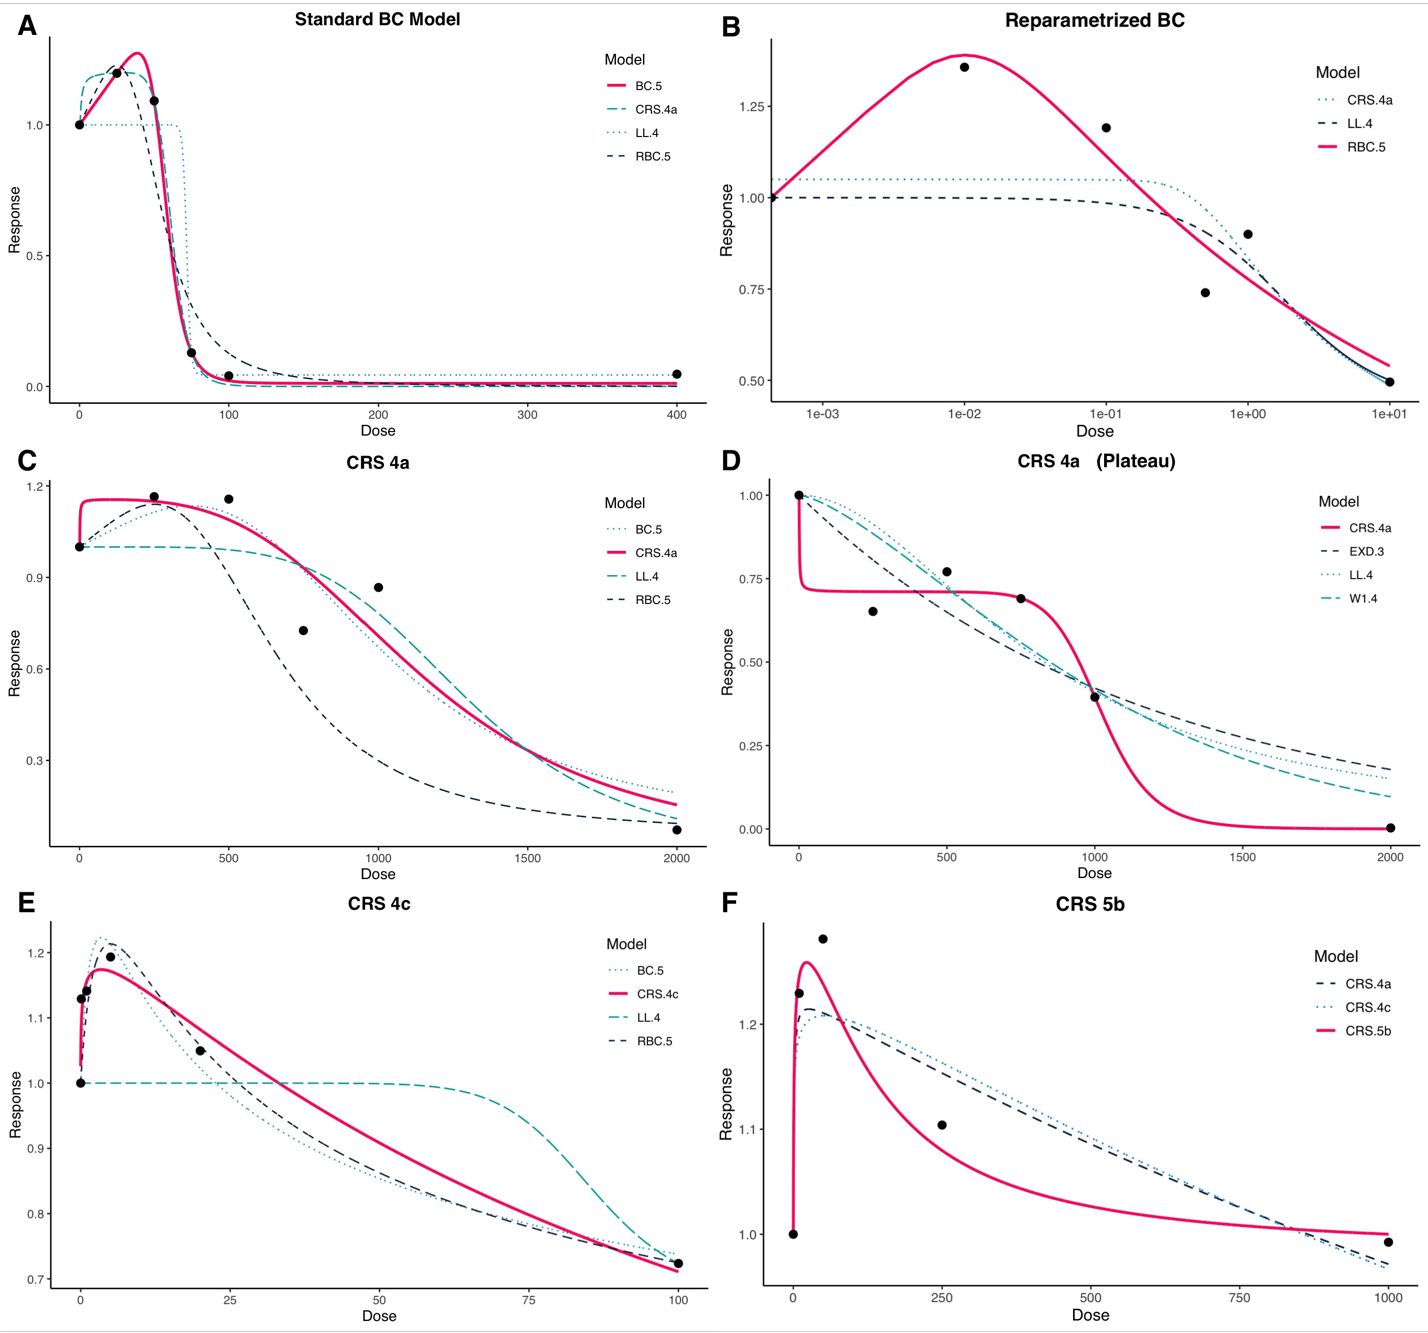


**Supplemental Figure 7.  Additional details about model fitting.** (**A**) An illustration of how linear interpolation (black) is used to generate an initial guess for the Exponential Decay model (blue, dashed) leading to successful model fitting (pink) (**B**) The distribution of models selected across the experiments analyzed in this paper.


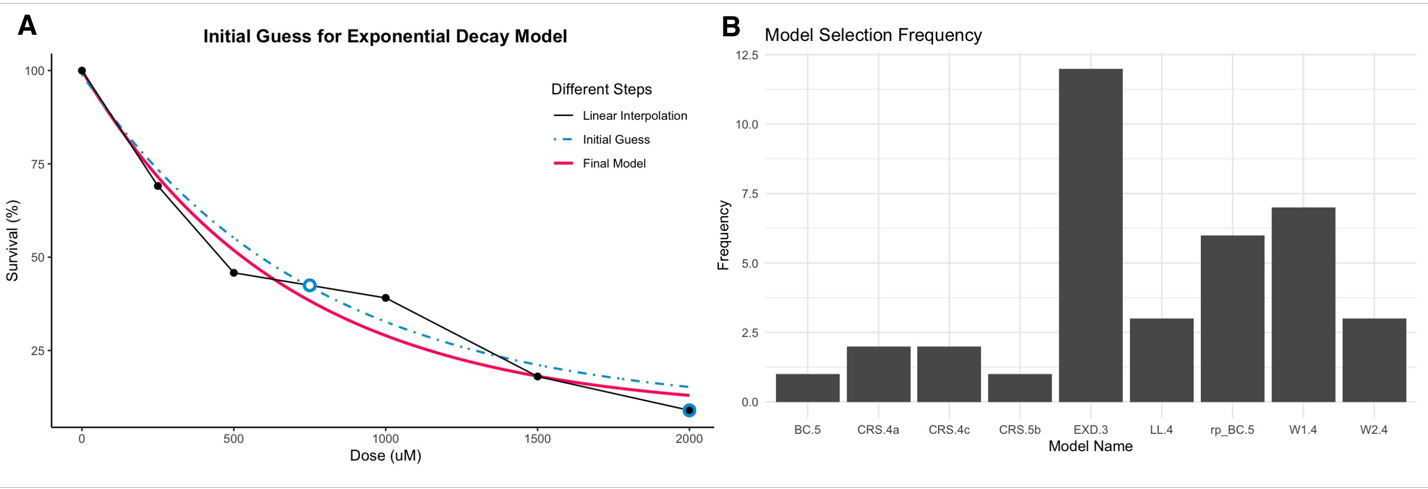


**Supplemental Figure 8.  DSS Comparison – DIPG vs. Etoposide.** Comparing Manual and Automated results for DIPG vs Etoposide, where automation increased the DSS by 41 points.(**A**) Manual image analysis and dose-response data. (**B**) Automated image analysis data and dose-response model (**C**) Manual DSS parameters and score, with pink and light. (**D**) Automated DSS parameters and score.


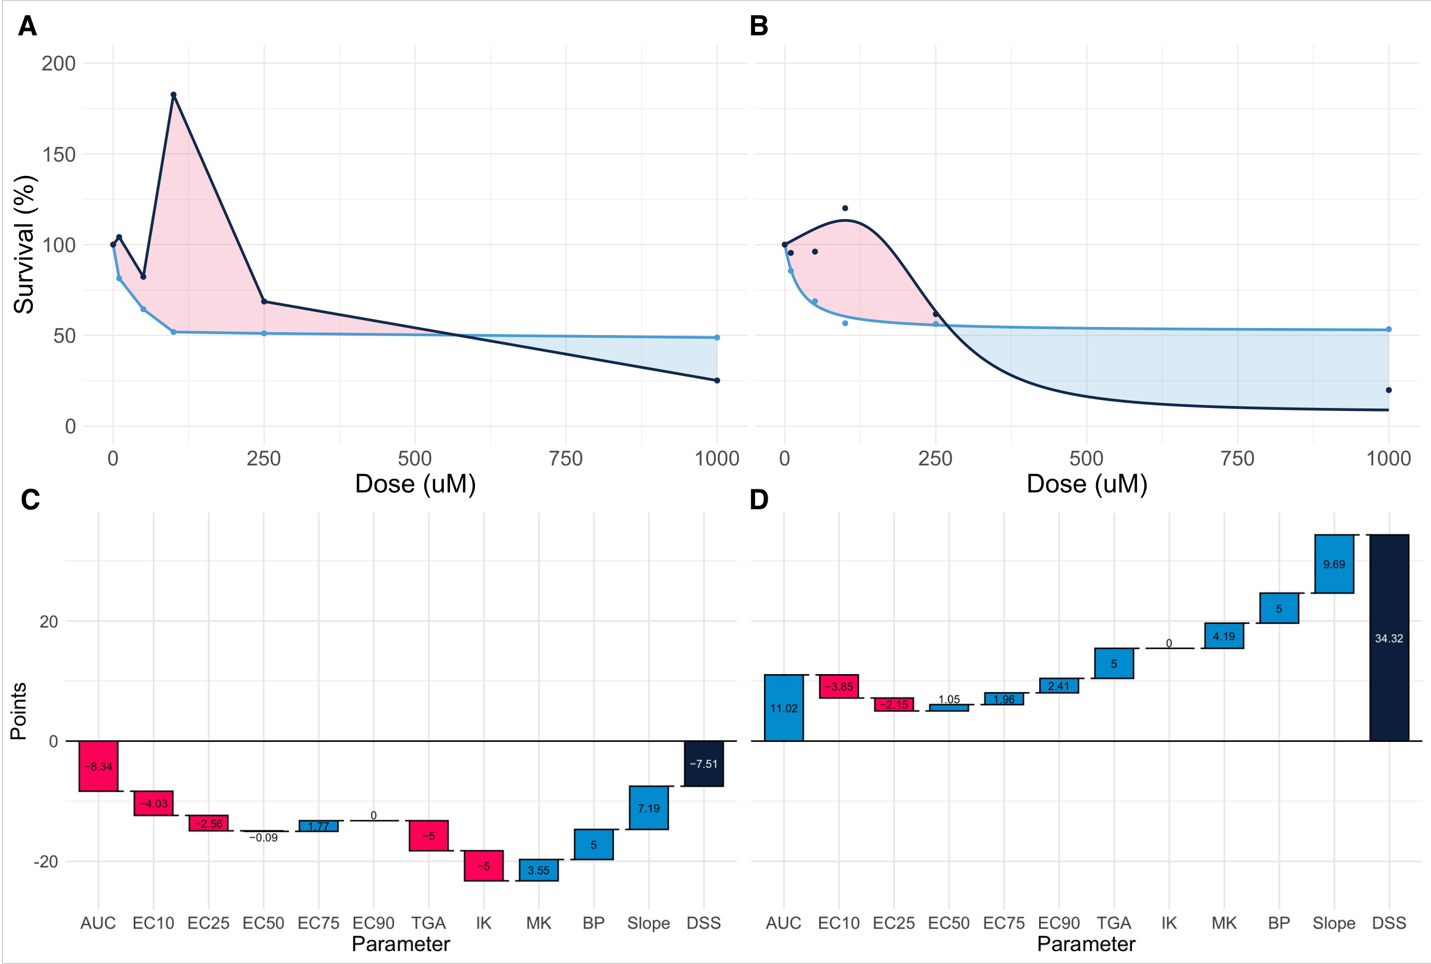


**Supplemental Figure 9. DSS Comparison – LN229 vs. Etoposide.** Comparing Manual and Automated results for LN229 vs Etoposide, where automation increased the DSS by 13 points.(**A**) Manual image analysis and dose-response data. (**B**) Automated image analysis data and dose-response model (**C**) Manual DSS parameters and score. (**D**) Automated DSS parameters and score.


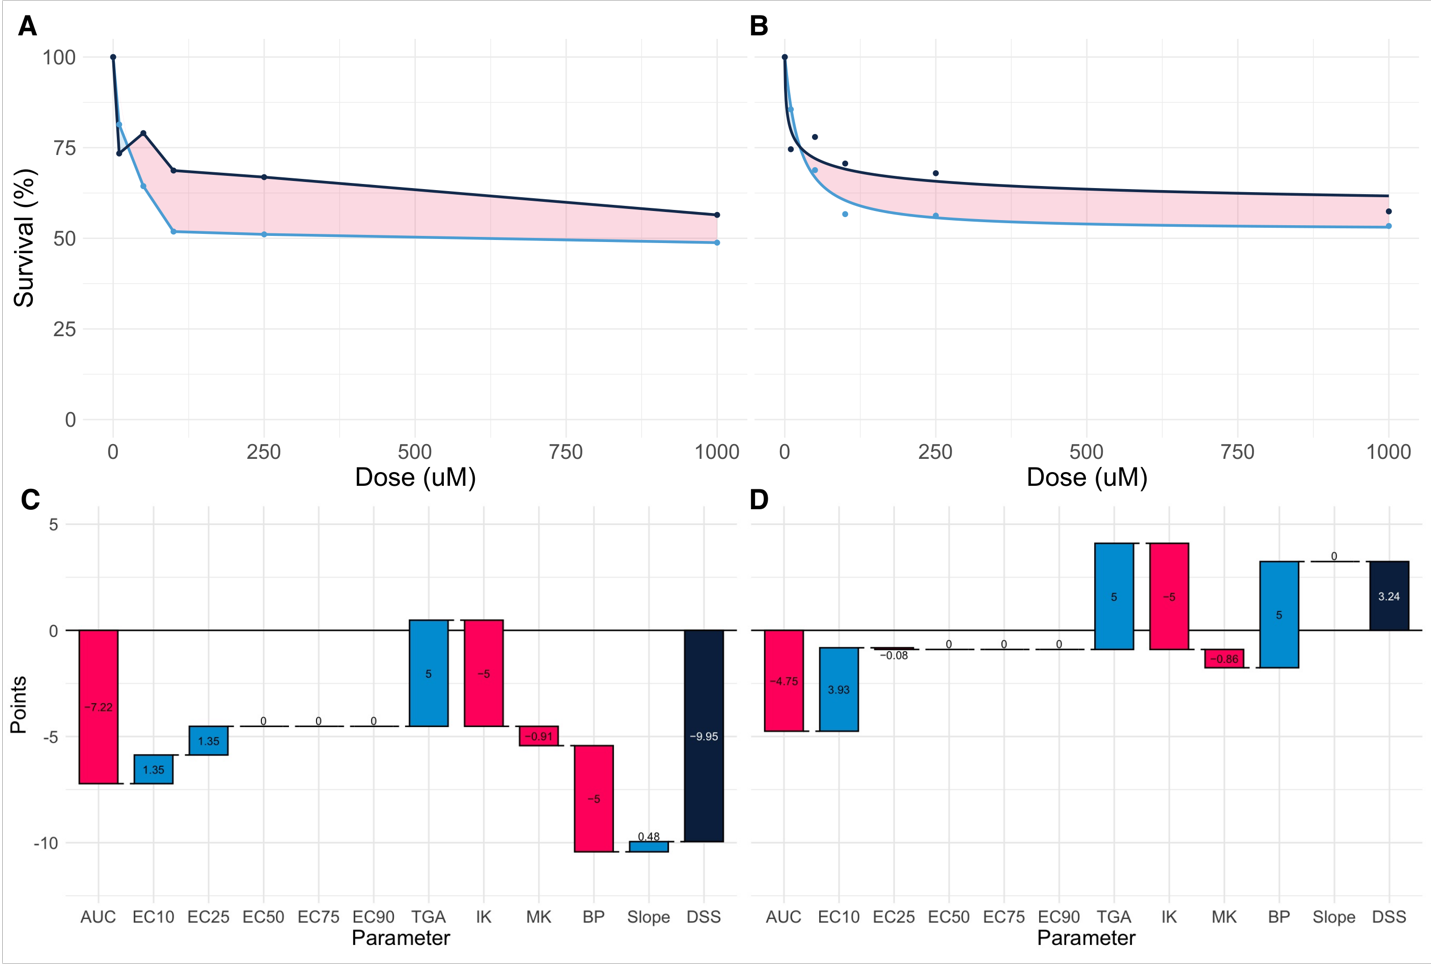


**Supplemental Figure 10.  DSS Comparison – MS21 vs. Cisplatin.** Comparing Manual and Automated results for MS21 vs Cisplatin, where automation increased the DSS by 2 points.(**A**) Manual image analysis and dose-response data. (**B**) Automated image analysis data and dose-response model (**C**) Manual DSS parameters and score. (**D**) Automated DSS parameters and score.


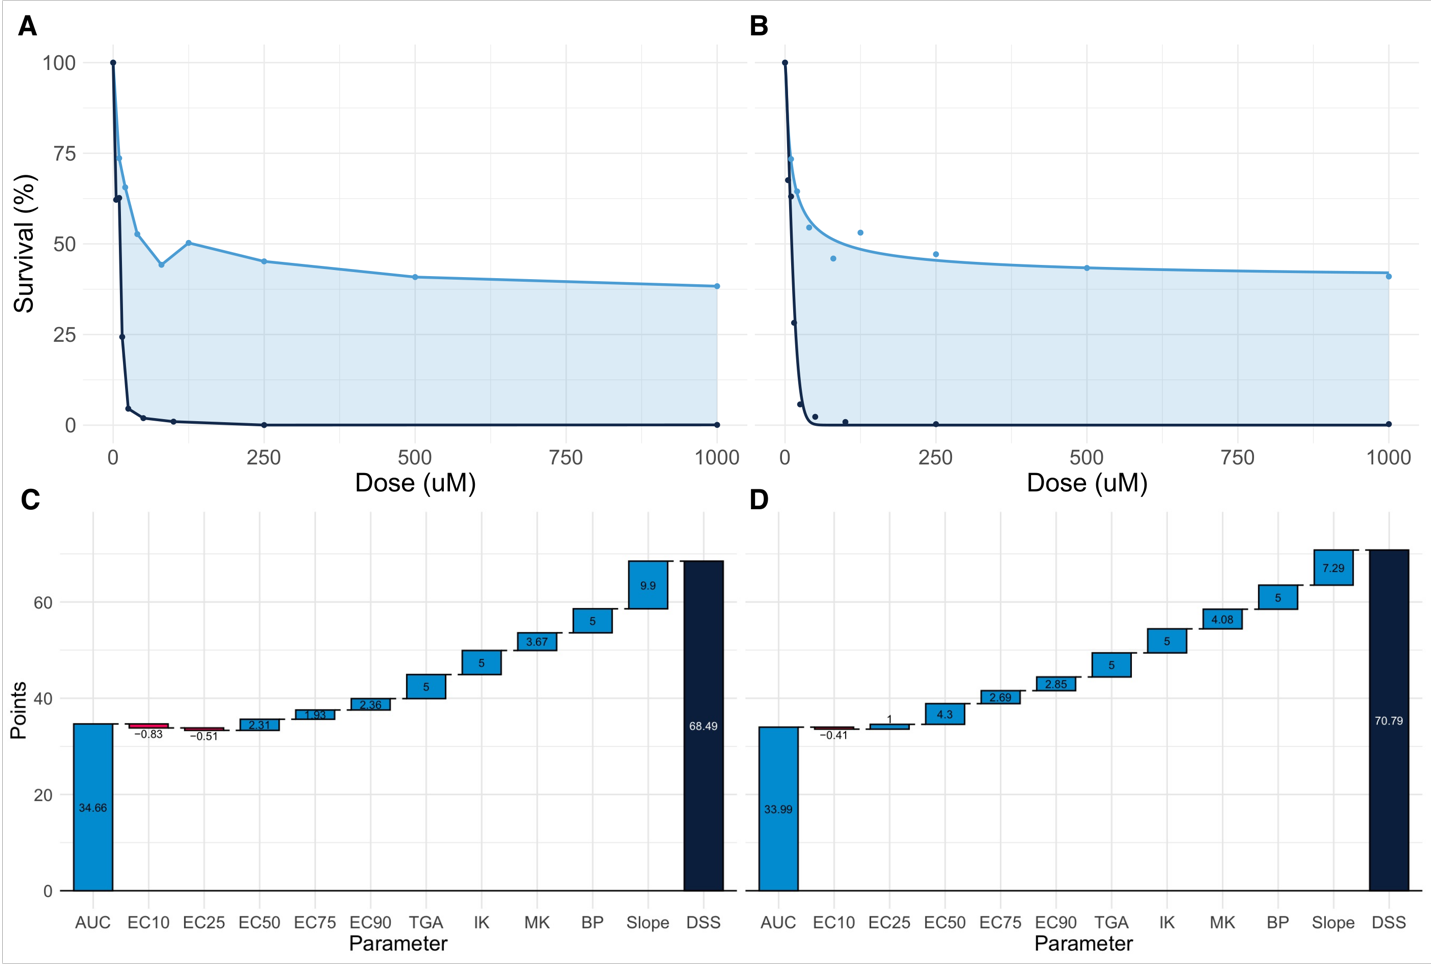


**Supplemental Figure 11. DSS Comparison – PT210468 vs. TR107.** Comparing Manual and Automated results for PT210468 vs TR107, where automation decreased the DSS by -5 points.(**A**) Manual image analysis and dose-response data. (**B**) Automated image analysis data and dose-response model (**C**) Manual DSS parameters and score. (**D**) Automated DSS parameters and score.


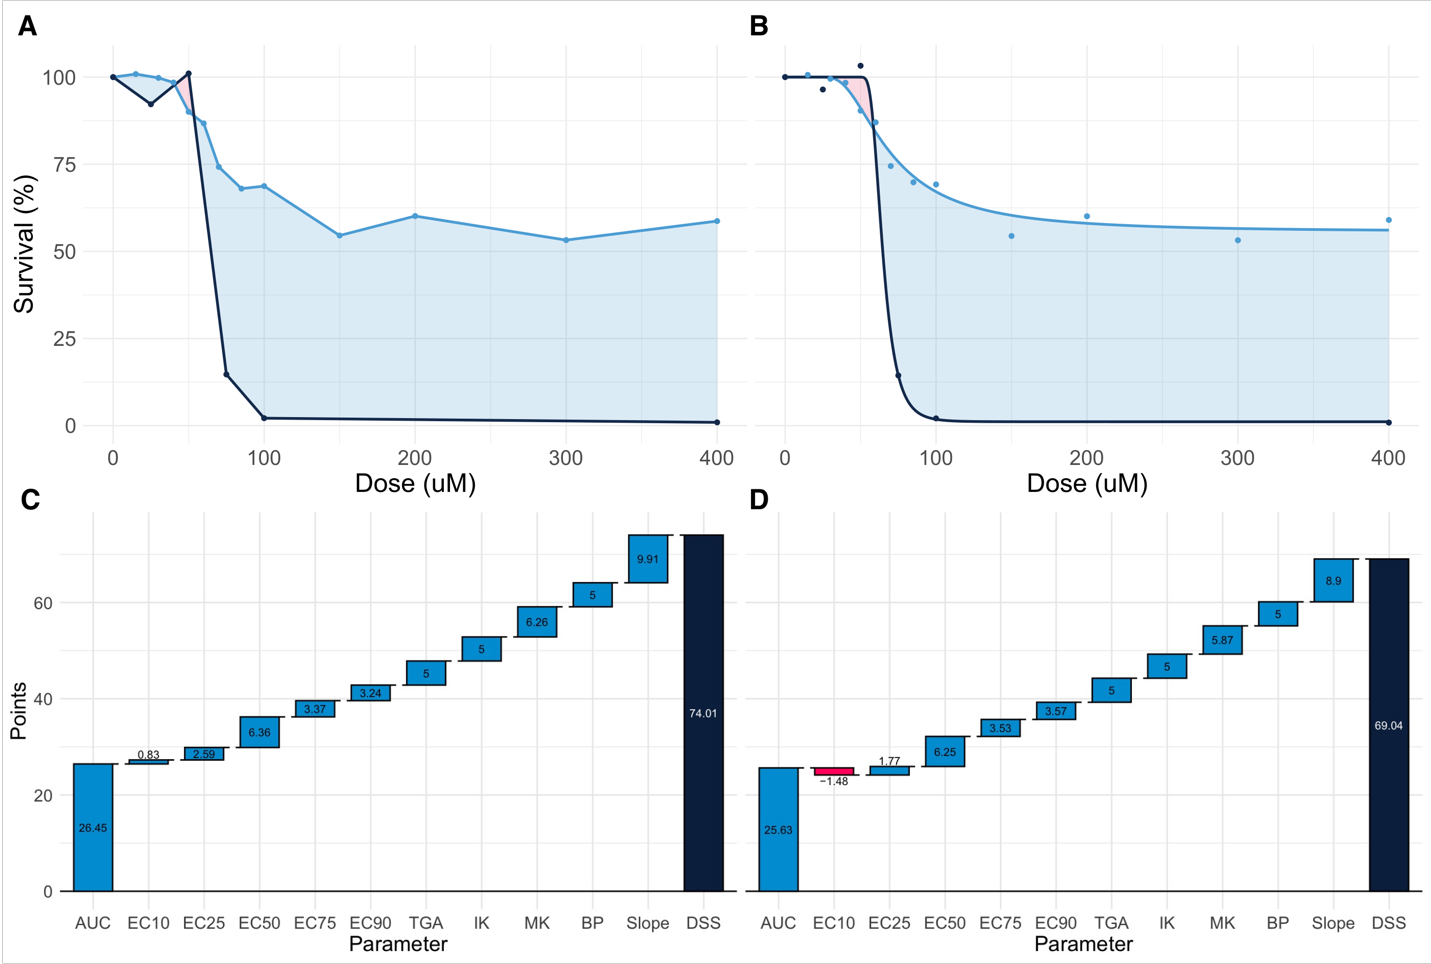


**Supplemental Figure 12.  DSS Comparison – PT220029 vs. Radiation.** Comparing Manual and Automated results for PT220029 vs Radiation, where automation decreased the DSS by -17 points.(**A**) Manual image analysis and dose-response data. (**B**) Automated image analysis data and dose-response model (**C**) Manual DSS parameters and score. (**D**) Automated DSS parameters and score.


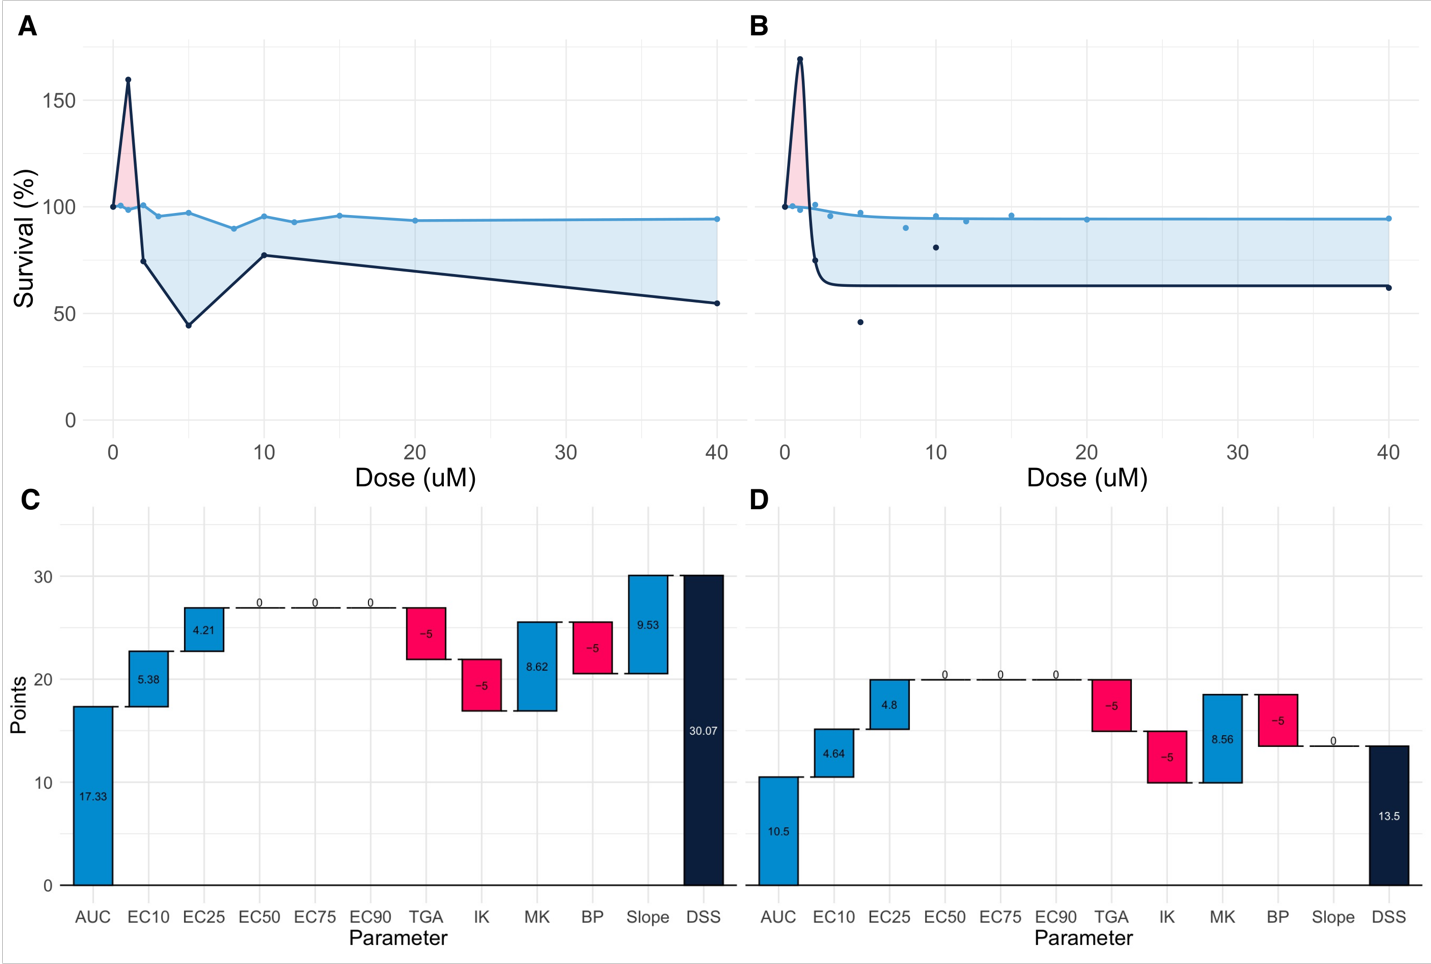


**Supplemental Figure 13.  DSS Comparison – PT210508 vs. Trametinib.** Comparing Manual and Automated results for PT210508 vs Trametinib, where automation decreased the DSS by -29 points.(**A**) Manual image analysis and dose-response data. (**B**) Automated image analysis data and dose-response model (**C**) Manual DSS parameters and score. (**D**) Automated DSS parameters and score.


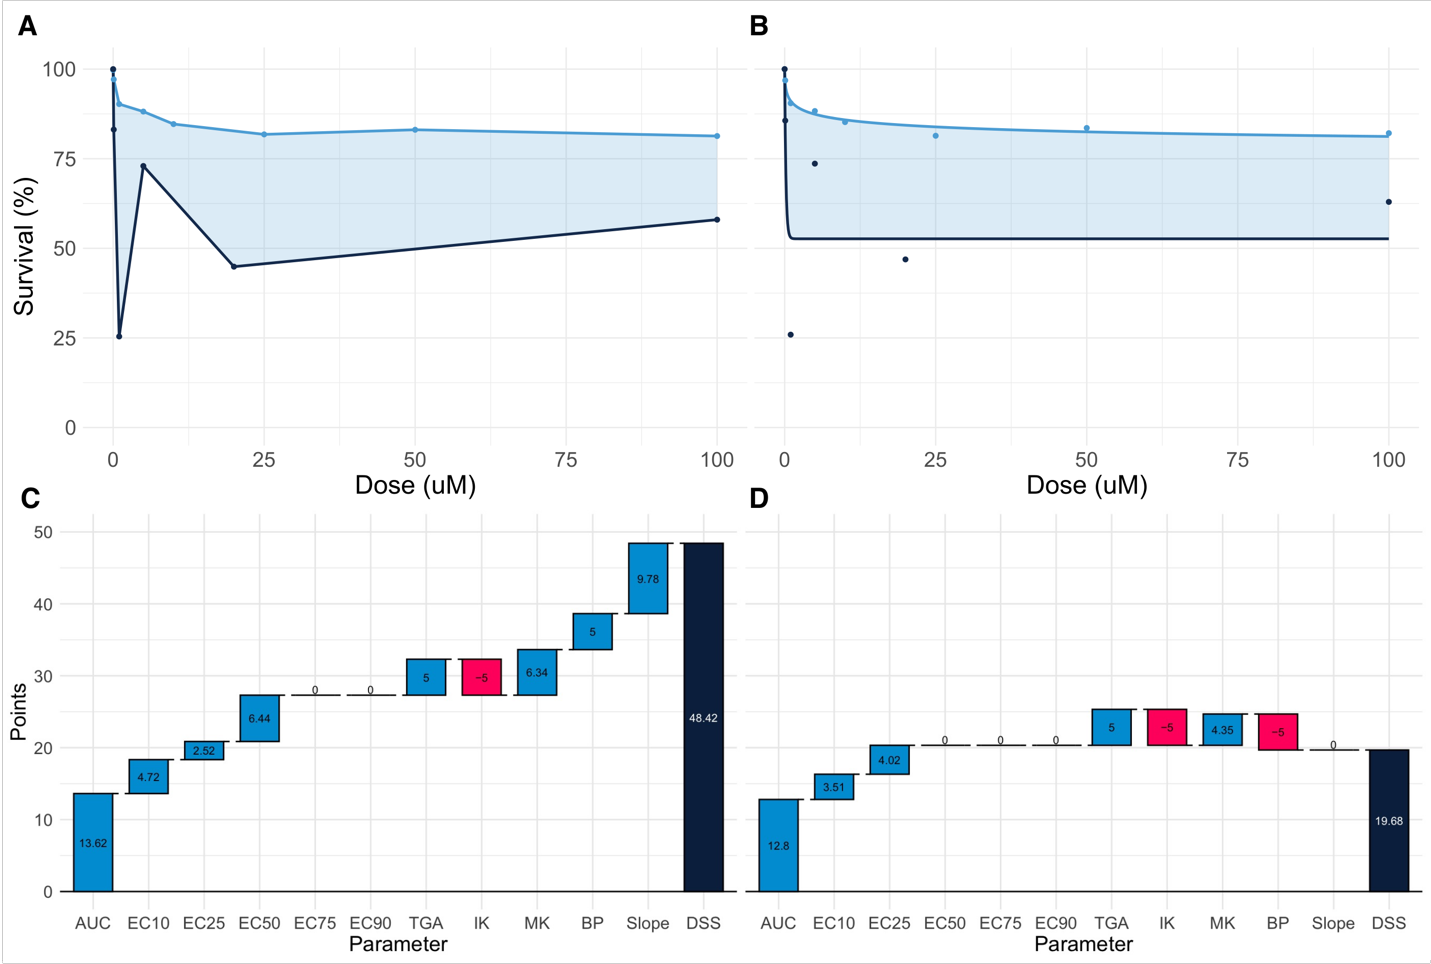

Supplement: Supplementary file 1 [file cc3f57575a39b9a38bf563f6.docx]
